# Supplementary material for: Pneumocystis Pneumonia in Patients with Autoimmune Diseases: A Retrospective Study Focused on Clinical Characteristics and Prognostic Factors Related to Death
Source: PLoS One. 2015 Sep 30;10(9):e0139144. doi: 10.1371/journal.pone.0139144 (PMC4589243; doi:10.1371/journal.pone.0139144)
Supplement: S4 Table — (XLSX) [file pone.0139144.s004.xlsx]

## Sheet: 工作表1
S4 table Laboratory findings and co-infections	laboratory findings
Patient	CD4+ T cell	Lymphocytes	WBC count	LDH	IgG	IgG	IgA	IgM	Albumin	PO2	PCO2	PH	PaO2/FiO2	Cytomegalovirus	Bacterium in BAL	Aspergillus in BAL
1	——	600	17.1	397	——	——	——	——	22	32	19	7.53	160	No	No	Yes
2	——	70	10.03	420	——	——	——	——	27	62	40	7.35	69	No	No	No
3	——	130	7.72	425	——	——	——	——	39	124	26	7.34	177	No	Yes	No
4	115	510	8.53	590	9	9.42	2.68	1.2	35	59	40	7.35	91	No	No	Yes
5	——	——	——	——	——	——	2.91	0.887	31	74	65	7.23	88	No	No	No
6	116	480	6.02	623	12	12.4	1.1	1.44	38	54	35	7.4	88	Yes	Yes	No
7	——	480	20.3	378	——	——	——	——	27	66	45	7.36	110	No	No	No
8	413	620	10.43	456	12	11.7	3.31	1.27	21	——	——	——	——	No	No	No
9	133	410	4.79	278	8	7.93	2.05	1.6	22	96	38	7.44	235	No	No	No
10	——	410	7.74	489	——	——	——	——	26	67	31	7.46	321	No	No	No
11	——	150	4.58	329	——	——	——	——	32	63	32	7.43	301	No	No	No
12	70	600	2.59	399	8	8.32	1.2	0.443	36	70	35	7.47	115	No	Yes	No
13	121	580	7.5	467	9	9.42	2.68	1.2	20	58	33	7.46	275	No	No	Yes
14	8	350	4.7	621	——	——	——	——	25	——	——	——	——	No	No	No
15	——	100	5.27	788	10	9.92	0.9	0.61	27	56	34	7.47	192	No	No	No
16	158	——	——	——	11	10.7	2.27	0.44	21	53	31	7.44	251	No	No	No
17	345	280	8.9	435	15	15.4	2.28	1.1	27	44	46	7.38	98	No	No	No
18	——	410	4.31	361	——	——	——	——	36	——	——	——	——	No	No	No
19	——	——	——	872	——	——	——	——	32	48	23	7.55	117	Yes	No	No
20	23	130	6.95	452	2	2.17	0.63	0.67	34	——	——	——	——	No	No	No
21	——	1470	20.83	522	——	——	——	——	37	63	45	7.34	88	No	No	No
22	51	——	——	——	——	——	——	——	33	57	38	7.43	71	Yes	No	No
23	——	680	6.33	394	——	——	——	——	35	——	——	——	——	No	No	No
24	——	——	——	——	——	——	——	——	34	72	30	7.48	250	No	No	No
25	——	270	10.06	765	3	2.66	1.45	1.35	37	59	34	7.53	283	Yes	No	No
26	——	280	1.93	657	13	13.1	2.38	1.65	31	74	41	7.42	185	No	No	No
27	——	590	11.68	369	——	——	——	——	22	81	47	7.34	162	No	Yes	No
28	——	230	7.11	388	6	5.6	1.31	0.76	33	104	27	7.44	104	Yes	No	No
29	516	——	——	——	12	11.5	1.97	0.59	33	70	35	7.43	233	No	No	No
30	974	4870	20.2	688	30	30.3	1.5	1.63	36	44	37	7.41	210	No	No	No
31	——	110	10.05	589	3	3.41	1.06	0.39	27	102	36	7.46	159	No	No	Yes
32	——	320	7.48	561	8	8.47	1.3	0.76	26	62	32	7.5	297	No	No	No
33	82	300	5	422	11	11.2	2.55	1.56	31	63	30	7.39	300	No	No	No
34	——	180	2.57	390	——	——	——	——	20	79	30	7.42	175	No	No	No
35	118	340	7.58	452	7	6.52	2.54	1.3	25	81	32	7.32	386	No	No	Yes
36	——	360	5.58	333	13	12.9	1.85	0.64	21	45	37	7.44	113	Yes	No	Yes
37	——	680	12.89	284	——	——	——	——	26	47	33	7.48	178	No	No	No
38	135	210	3.76	607	——	——	——	——	36	67	41	7.36	319	No	No	No
39	——	580	4.78	455	——	——	——	——	28	51	37	7.44	242	Yes	No	No
40	230	407	3.55	370	9	8.9	——	——	31	66	42	7.38	314	No	No	No
41	110	310	4.67	719	5	5.1	——	——	29	71	39	7.35	245	No	No	Yes
42	38	520	1.22	599	6	6.1	——	——	27	47	45	7.32	167	Yes	No	No
43	——	——	——	322	——	——	——	——	35	57	50	7.29	95	Yes	No	No
44	112	700	6.7	230	——	——	——	——	31	50	33	7.43	142	No	No	No
45	73	320	5.2	467	6	5.8	——	——	38	77	42	7.36	308	No	No	No
46	——	420	3.75	259	——	——	——	——	33	73	43	7.41	347	Yes	No	No
47	——	——	——	——	——	——	——	——	28	48	49	7.33	96	No	No	No
48	——	550	4.7	611	——	——	——	——	25	77	44	7.38	308	No	No	No
49	78	——	——	——	——	——	——	——	30	63	34	7.34	79	No	No	No
50	——	650	3.77	467	——	——	——	——	31	72	42	7.36	257	Yes	No	No
51	——	1100	8.91	477	9	9.3	——	——	28	62	39	7.4	187	No	No	No
52	——	200	7.2	399	6	5.6	——	——	30	55	47	7.33	167	No	No	No
53	180	670	6.31	412	6	6.4	——	——	36	73	38	7.36	347	No	No	No
54	230	870	5.33	514	12	11.5	——	——	33	67	41	7.41	319	No	No	No
55	——	——	——	——	——	——	——	——	33	81	37	7.39	289	Yes	No	No
56	——	230	6.78	310	6	6.2	——	——	25	89	33	7.45	178	Yes	No	Yes
57	40	180	3.58	222	——	——	——	——	30	61	33	7.44	220	No	Yes	No
58	——	240	4.21	——	——	——	——	——	36	59	40	7.37	280	No	No	No
59	——	——	——	——	——	——	——	——	30	60	55	7.34	310	No	No	No
60	180	890	7.61	765	——	——	——	——	32	73	40	7.41	370	No	No	No
61	——	——	——	——	——	——	——	——	28	55	61	7.33	130	No	No	No
62	——	480	5.77	422	——	——	——	——	27	71	35	7.4	160	No	No	No
63	——	10	12.14	563	——	——	——	——	35	76	45	7.39	290	No	No	No
64	——	——	——	——	——	——	——	——	37	65	——	——	410	No	No	No
65	——	440	2.71	630	——	——	——	——	33	110	31	7.51	450	No	No	No
66	——	1360	16.76	520	——	——	——	——	24	62	57	7.44	150	No	No	No
67	45	910	4.21	466	——	——	——	——	38	89	34	7.46	350	No	No	No
68	——	170	7.3	432	——	——	——	——	36	55	30	7.35	330	No	No	No
69	45	230	3.1	355	15	15.2	——	——	23	60	36	7.33	130	No	No	No
